# Supplementary material for: Modulation of Rxrα Expression in Mononuclear Phagocytes Impacts on Cardiac Remodeling after Ischemia-Reperfusion Injury
Source: MDPI journal article supplement (doi:10.3390/biomedicines10061274), 2022-05-30
Supplement: s1 [file s1]

qPCR

● +/+  
■ Cre/+

CCR2 expr. mo (arb. units)

ns

| Group           | Mean Expression (arb. units) | Individual Data Points (arb. units)         |
|-----------------|------------------------------|---------------------------------------------|
| Control (green) | ~8.8                         | ~5.5, ~7.2, ~8.8, ~13.5                     |
| LPS (blue)      | ~9.4                         | ~6.5, ~7.0, ~7.8, ~8.0, ~10.5, ~11.0, ~13.0 |

**Table S1**

| <b>Antibody/Dye</b>                                                          | <b>Company</b>          | <b>Ref. no.</b> | <b>Dilution</b> |
|------------------------------------------------------------------------------|-------------------------|-----------------|-----------------|
| <b><u>FACS - Heart/brain</u></b>                                             |                         |                 |                 |
| PerCP/Cyanine5.5 anti-mouse CD45 antibody                                    | BioLegend               | 103132          | 1:100           |
| PE anti-mouse NK-1.1 antibody                                                | BioLegend               | 108708          | 1:100           |
| PE anti-mouse Ly-6G Antibody                                                 | BioLegend               | 127608          | 1:100           |
| PE anti-mouse TCR $\beta$ chain Antibody                                     | BioLegend               | 109208          | 1:100           |
| PE anti-mouse TER-119/Erythroid Cells antibody                               | BioLegend               | 116208          | 1:100           |
| PE anti-mouse CD11c antibody                                                 | BioLegend               | 117308          | 1:100           |
| APC anti-mouse CD64 (Fc $\gamma$ RI) antibody                                | BioLegend               | 139306          | 1:100           |
| Brilliant Violet 421™ anti-mouse F4/80 antibody                              | BioLegend               | 123132          | 1:50            |
| <b><u>Subpopulations</u></b>                                                 |                         |                 |                 |
| PE/Cy7 anti-mouse I-A/I-E antibody                                           | BioLegend               | 107630          | 1:100           |
| Brilliant Violet 510™ anti-mouse Ly-6C antibody                              | BioLegend               | 128033          | 1:100           |
| <b><u>FACS - Blood</u></b>                                                   |                         |                 |                 |
| APC anti-mouse CD115 (CSF-1R) antibody                                       | BioLegend               | 135510          | 1:100           |
| <b><u>Subpopulations</u></b>                                                 |                         |                 |                 |
| Brilliant Violet 421™ anti-mouse Ly-6C antibody                              | BioLegend               | 128032          | 1:100           |
| <b><u>IF - Proliferation of cardiac macrophages (d2)</u></b>                 |                         |                 |                 |
| Unconjugated F4/80 antibody                                                  | ThermoFisher            | 14-4801-82      | 1:50            |
| Cy™3 AffiniPure Goat Anti-Rat IgG (H+L)                                      | Jackson ImmunoResearch  | 112-165-003     | 1:200           |
| Ki67/MKI67 antibody                                                          | Novus Biologicals       | NB500-170       | 1:50            |
| Goat anti-Rabbit IgG (H+L) Cross-Adsorbed Secondary antibody Alexa Fluor 488 | ThermoFisher            | A-11008         | 1:200           |
| Hoechst 33342                                                                | ThermoFisher            | H3570           | 1:1000          |
| <b><u>IF - Cardiac neovascularization (d30)</u></b>                          |                         |                 |                 |
| Rat Anti-Mouse CD31 antibody                                                 | BDBioscience            | 550274          | 1:25            |
| Cy™3 AffiniPure Goat Anti-Rat IgG (H+L)                                      | Jackson ImmunoResearch  | 112-165-003     | 1:200           |
| Wheat Germ Agglutinin Alexa Fluor™ 350 conjugated antibody                   | ThermoFisher Scientific | W11263          | 1:100           |

**Table S2**

| <b><u>Analyte</u></b>                | <b><u>Gene ID</u></b> | <b><u>Alternate nomenclature</u></b>                 |
|--------------------------------------|-----------------------|------------------------------------------------------|
| Adiponectin/Acrp30                   | 11450                 | AdipoQ                                               |
| Amphiregulin                         | 11839                 | AR, SDGF                                             |
| Angiopoietin-1                       | 11600                 | Ang-1, Angpt1                                        |
| Angiopoietin-2                       | 11601                 | Ang-2, Angpt2                                        |
| Angiopoietin-like 3                  | 30924                 | ANGPT-L3                                             |
| BAFF/BLyS/TNFSF13B                   | 24099                 | CD257, TALL1, THANK, ZTNF4                           |
| C1q R1/CD93                          | 17064                 | AA4 Antigen, C1q Rp, CD93                            |
| CCL2/JE/MCP-1                        | 20296                 | MCAF                                                 |
|                                      | 20302/                |                                                      |
| CCL3/CCL4/MIP-1 $\alpha$ / $\beta$   | 20303                 |                                                      |
| CCL5/RANTES                          | 20304                 | SISd                                                 |
| CCL6/C10                             | 20305                 | MRP-1                                                |
| CCL11/Eotaxin                        | 20292                 |                                                      |
| CCL12/MCP-5                          | 20293                 |                                                      |
| CCL17/TARC                           | 20295                 |                                                      |
| CCL19/MIP-3 $\beta$                  | 24047                 | ELC                                                  |
| CCL20/MIP-3 $\alpha$                 | 20297                 | exodus-1, LARC                                       |
| CCL21/6Ckine                         | 18829                 | exodus-2, SCYA21, SLC, TCA-4                         |
| CCL22/MDC                            | 20299                 | ABCD-1, MDC, STCP-1                                  |
| CD14                                 | 12475                 |                                                      |
| CD40/TNFRSF5                         | 21939                 |                                                      |
| CD160                                | 54215                 | Natural killer cell receptor BY55, NK1; NK28         |
| Chemerin                             | 71660                 | RARRES2, TIG-2                                       |
| Chitinase 3-like 1                   | 12654                 | CHI3L1, Cgp39, YKL40                                 |
| Coagulation Factor III/Tissue Factor | 14066                 | TF, CD142, Thromboplastin                            |
| Complement Component C5/C5a          | 15139                 | C5/C5a                                               |
| Complement Factor D                  | 11537                 | Adipsin, C3 convertase activator, Properdin factor D |
| C-Reactive Protein/CRP               | 12944                 |                                                      |
| CX3CL1/Fractalkine                   | 20312                 | FKN, Neurotactin                                     |
| CXCL1/KC                             | 14825                 | CINC-1; GRO $\alpha$ ; KC; MGSA- $\alpha$            |
| CXCL2/MIP-2                          | 20310                 | GRO $\beta$ , GRO2, CINC-3                           |
| CXCL9/MIG                            | 17329                 | CRG-10, CMK                                          |
| CXCL10/IP-10                         | 15945                 | CRG-2, C7                                            |
| CXCL11/I-TAC                         | 56066                 | H174, SCYB9B                                         |
| CXCL13/BLC/BCA-1                     | 55985                 |                                                      |
| CXCL16                               | 66102                 | SRPSOX                                               |
| Cystatin C                           | 13010                 | ARMD11, CST3, Gamma-trace                            |
| DKK-1                                | 13380                 | Dickkopf-1                                           |
| DPPIV/CD26                           | 13482                 | Dpp4, Dipeptidyl-peptidase IV                        |
| EGF                                  | 13645                 | Epidermal Growth Factor                              |
| Endoglin/CD105                       | 13805                 | ENG                                                  |
| Endostatin                           | 12822                 | Col18a1                                              |
| Fetuin A/AHSG                        | 11625                 | AHSG, $\alpha$ -2-HS-glycoprotein                    |
| FGF acidic                           | 14164                 | FGF-1                                                |
| FGF-21                               | 56636                 |                                                      |
| Flt-3 Ligand                         | 14256                 | Flt3lg                                               |
| Gas 6                                | 14456                 | Growth Arrest Specific                               |
| G-CSF                                | 12985                 | Csf3                                                 |
| GDF-15                               | 23886                 | MIC-1                                                |

| <b><u>Analyte</u></b>           | <b><u>Gene ID</u></b> | <b><u>Alternate nomenclature</u></b>       |
|---------------------------------|-----------------------|--------------------------------------------|
| GM-CSF                          | 12981                 | Csf2                                       |
| HGF                             | 15234                 | Scatter Factor, SF, Hepatopoietin-A        |
| ICAM-1/CD54                     | 15894                 |                                            |
| IFN- $\gamma$                   | 15978                 | IFNG                                       |
| IGFBP-1                         | 16006                 |                                            |
| IGFBP-2                         | 16008                 |                                            |
| IGFBP-3                         | 16009                 |                                            |
| IGFBP-5                         | 16011                 |                                            |
| IGFBP-6                         | 16012                 |                                            |
| IL-1 $\alpha$ /IL-1F1           | 16175                 |                                            |
| IL-1 $\beta$ /IL-1F2            | 16176                 |                                            |
| IL-1ra/IL-1F3                   | 16181                 | IL1RN                                      |
| IL-2                            | 16183                 |                                            |
| IL-3                            | 16187                 |                                            |
| IL-4                            | 16189                 | B cell-stimulatory factor-1                |
| IL-5                            | 16191                 |                                            |
| IL-6                            | 16193                 |                                            |
| IL-7                            | 16196                 |                                            |
| IL-10                           | 16153                 | CSIF                                       |
| IL-11                           | 16156                 |                                            |
| IL-12 p40                       | 16160                 |                                            |
| IL-13                           | 16163                 |                                            |
| IL-15                           | 16168                 |                                            |
| IL-17A                          | 16171                 |                                            |
| IL-22                           | 50929                 | IL-TIF                                     |
| IL-23                           | 83430                 |                                            |
| IL-27 p28                       | 246779                |                                            |
| IL-28A/B                        | 330496/338374         |                                            |
| IL-33                           | 77125                 | NF HEV, DVS 27                             |
| LDL R                           | 16835                 | low density lipoprotein receptor           |
| Leptin                          | 16846                 | OB                                         |
| LIF                             | 16878                 |                                            |
| Lipocalin-2/NGAL                | 16819                 | Siderocalin, 24p3                          |
| LIX                             | 20311                 | CXCL5, GCP-2, ENA-78                       |
| M-CSF                           | 12977                 | CSF-1                                      |
| MMP-2                           | 17390                 | Gelatinase A                               |
| MMP-3                           | 17392                 | Stromelysin-1                              |
| MMP-9                           | 17395                 | Clg4b, Gelatinase B, GELB                  |
| Myeloperoxidase                 | 17523                 | MPO                                        |
| Osteopontin (OPN)               | 20750                 | Eta-1, Spp1                                |
| Osteoprotegerin/TNFRSF11B       | 18383                 | OPG, Ocif                                  |
| PD-ECGF/Thymidine phosphorylase | 72962                 | dThdPase, ECGF1, Gliostatin, MEDPS1, MNGIE |
| PDGF-BB                         | 18591                 |                                            |
| Pentraxin 2/SAP                 | 20219                 | PTX2                                       |
| Pentraxin 3/TSG-14              | 19288                 | PTX3                                       |
| Periostin/OSF-2                 | 50706                 | Fasciclin I-like, POSTN, TRIF52            |
| Pref-1/DLK-1/FA1                | 13386                 | DLK1, pG2, ZOG                             |
| Proliferin                      | 18811                 | MRP                                        |
| Proprotein Convertase 9/PCSK9   | 100102                | NARC-1                                     |
| RAGE                            | 11596                 | AGER                                       |
| RBP4                            | 19662                 | Retinol-Binding Protein 4                  |

| <b><u>Analyte</u></b> | <b><u>Gene ID</u></b> | <b><u>Alternate nomenclature</u></b> |
|-----------------------|-----------------------|--------------------------------------|
| Reg3G                 | 19695                 | PAP3                                 |
| Resistin              | 57264                 | ADSF, FIZZ3                          |
| E-Selectin/CD62E      | 20339                 | ELAM1, LECAM2, Sele                  |
| P-Selectin/CD62P      | 20344                 | GMP-140, LECAM3, Selep               |
| Serpin E1/PAI-1       | 18787                 | Nexin, PLANH1                        |
| Serpin F1/PEDF        | 20317                 | EPC-1                                |
| Thrombopoietin        | 21832                 | Tpo, MGDF                            |
| TIM-1/KIM-1/HAVCR     | 171283                |                                      |
| TNF- $\alpha$         | 21926                 | TNFSF1A                              |
| VCAM-1/CD106          | 22329                 |                                      |
| VEGF                  | 22339                 | VEGF-A, VPF                          |
| WISP-1/CCN4           | 22402                 |                                      |
